# Supplementary material for: Genomic patterns resembling BRCA1- and BRCA2-mutated breast cancers predict benefit of intensified carboplatin-based chemotherapy
Source: PubMed Central journal article supplement (PMC4076636; doi:10.1186/bcr3655), 2014-05-15

Supplementary Figure 1

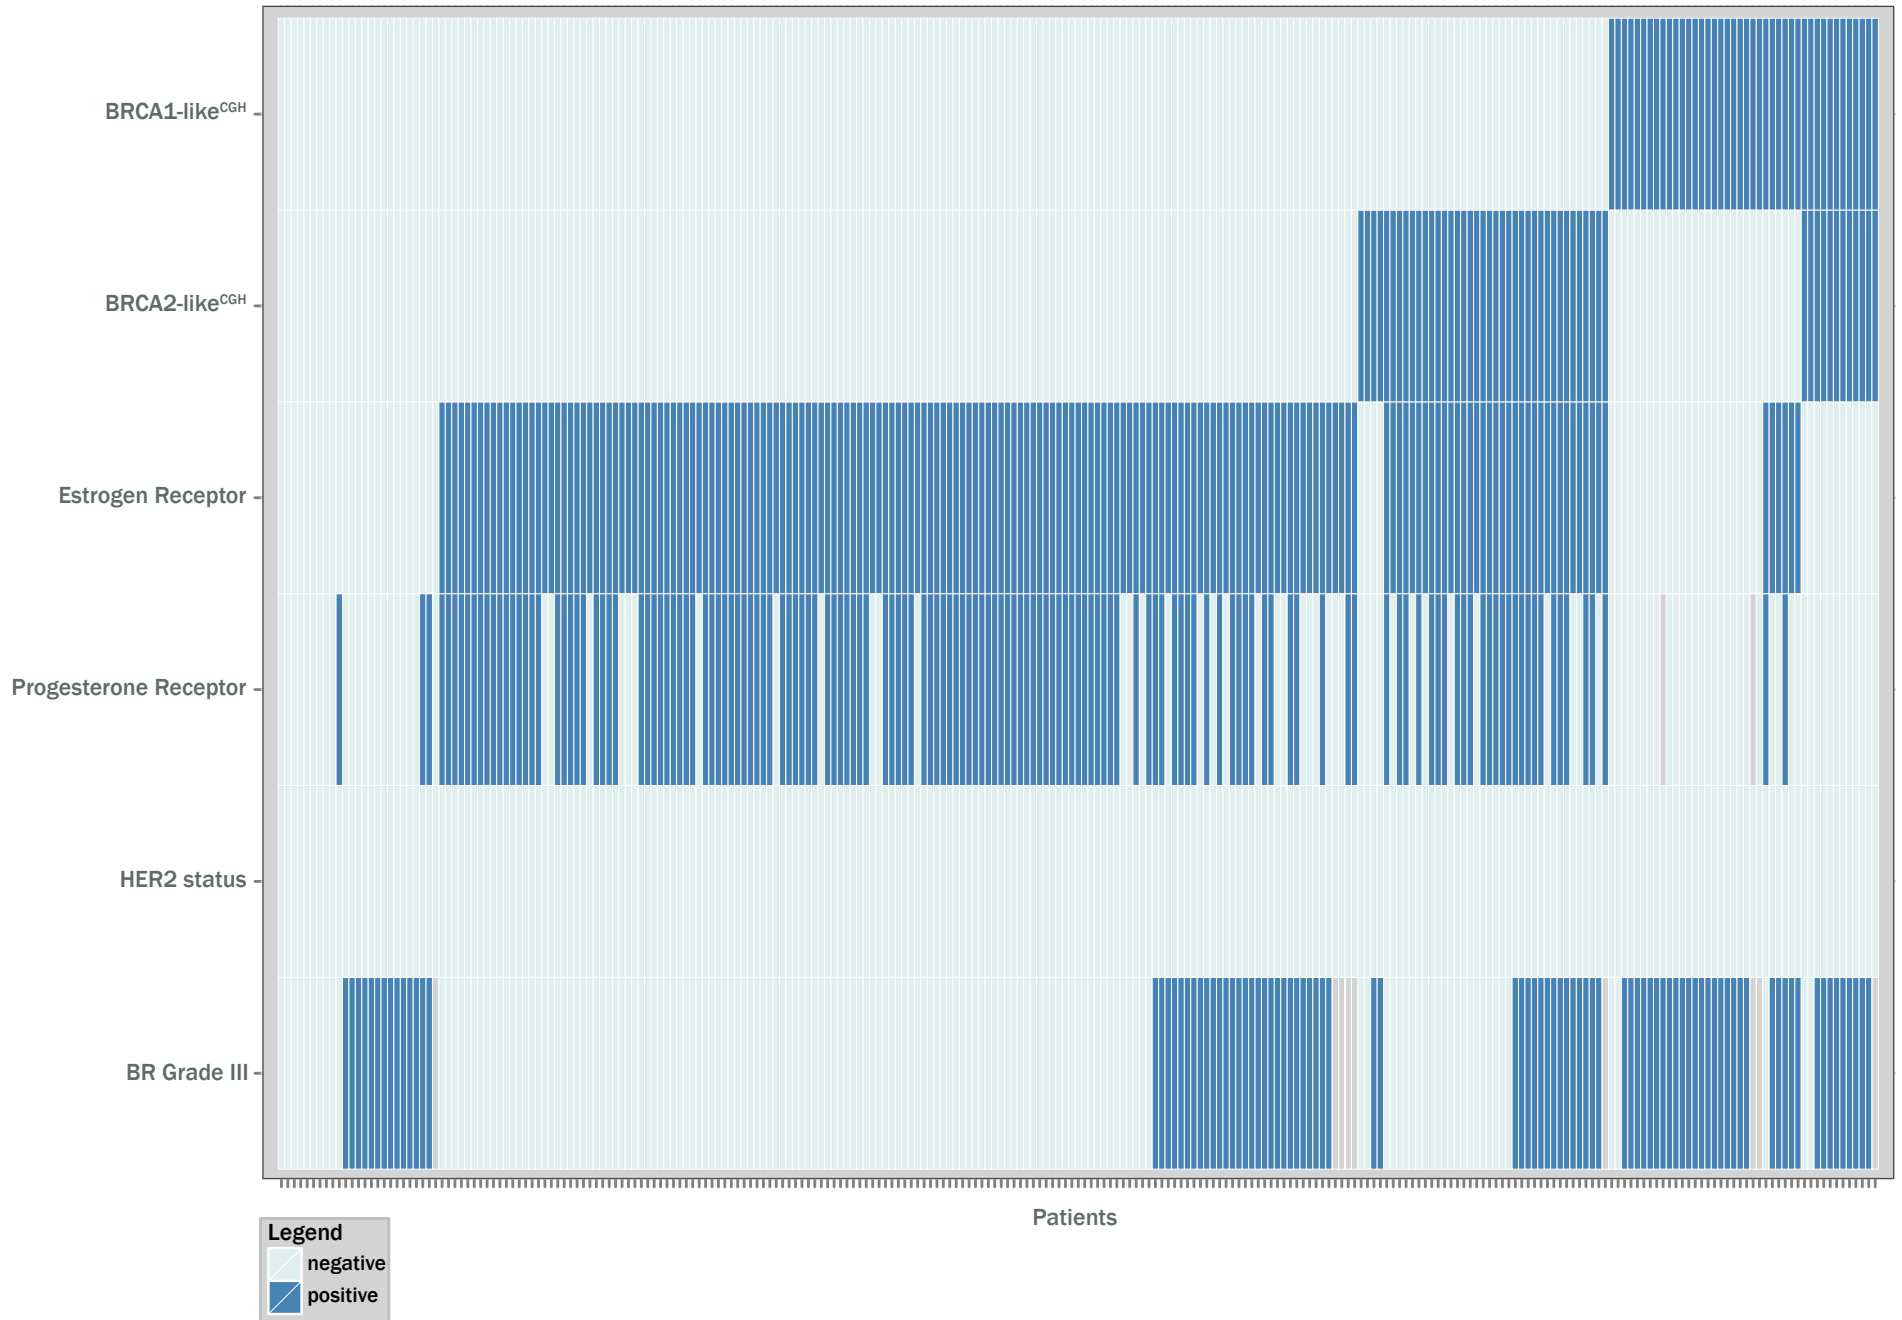

Supplementary Figure 2

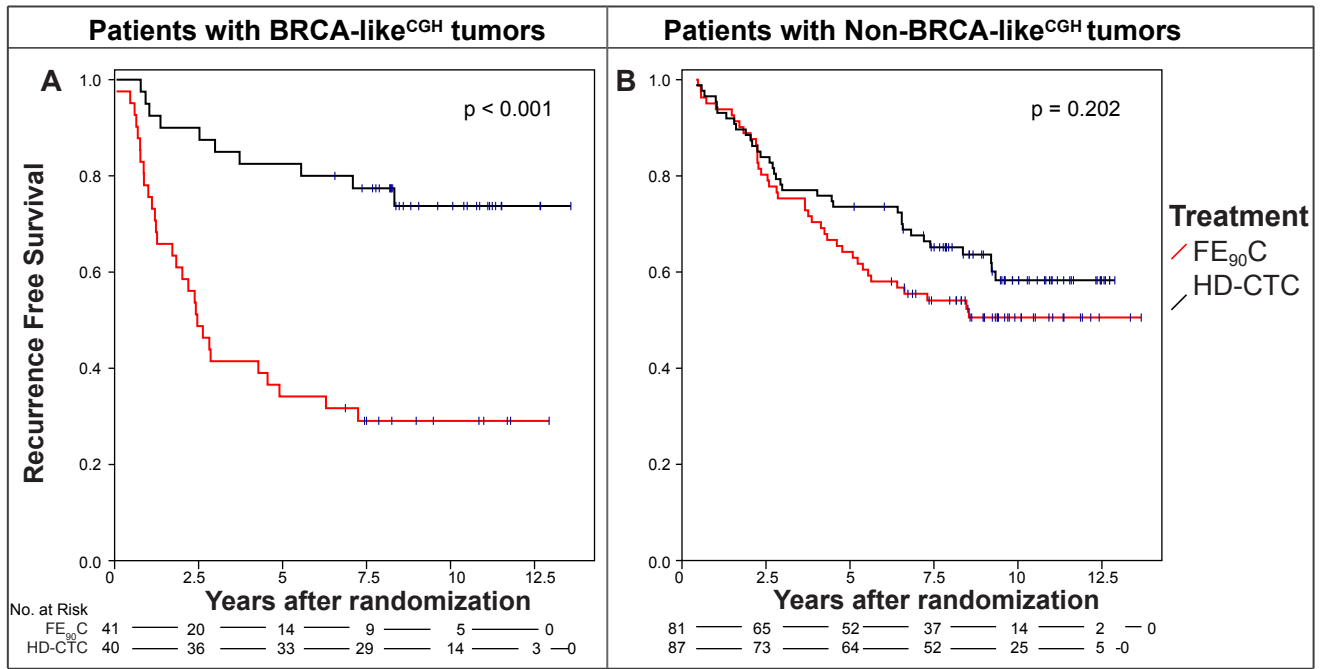

Supplementary Figure 3

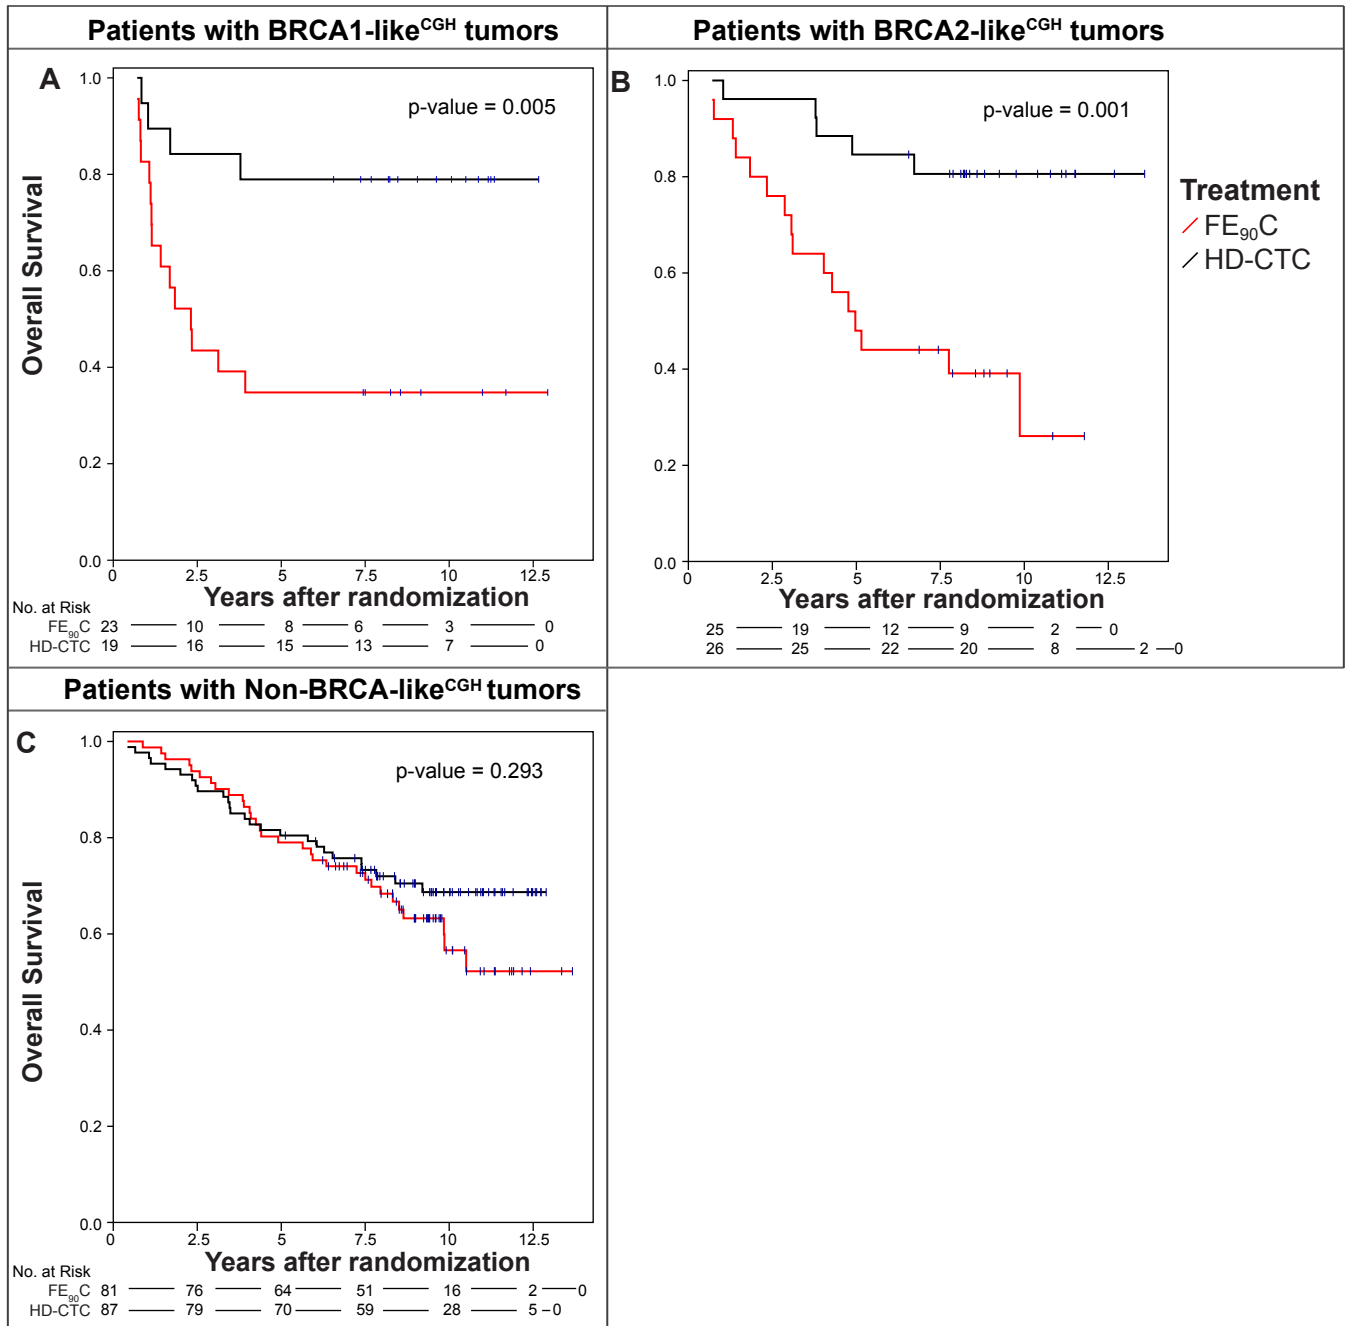

Supplementary Figure 4

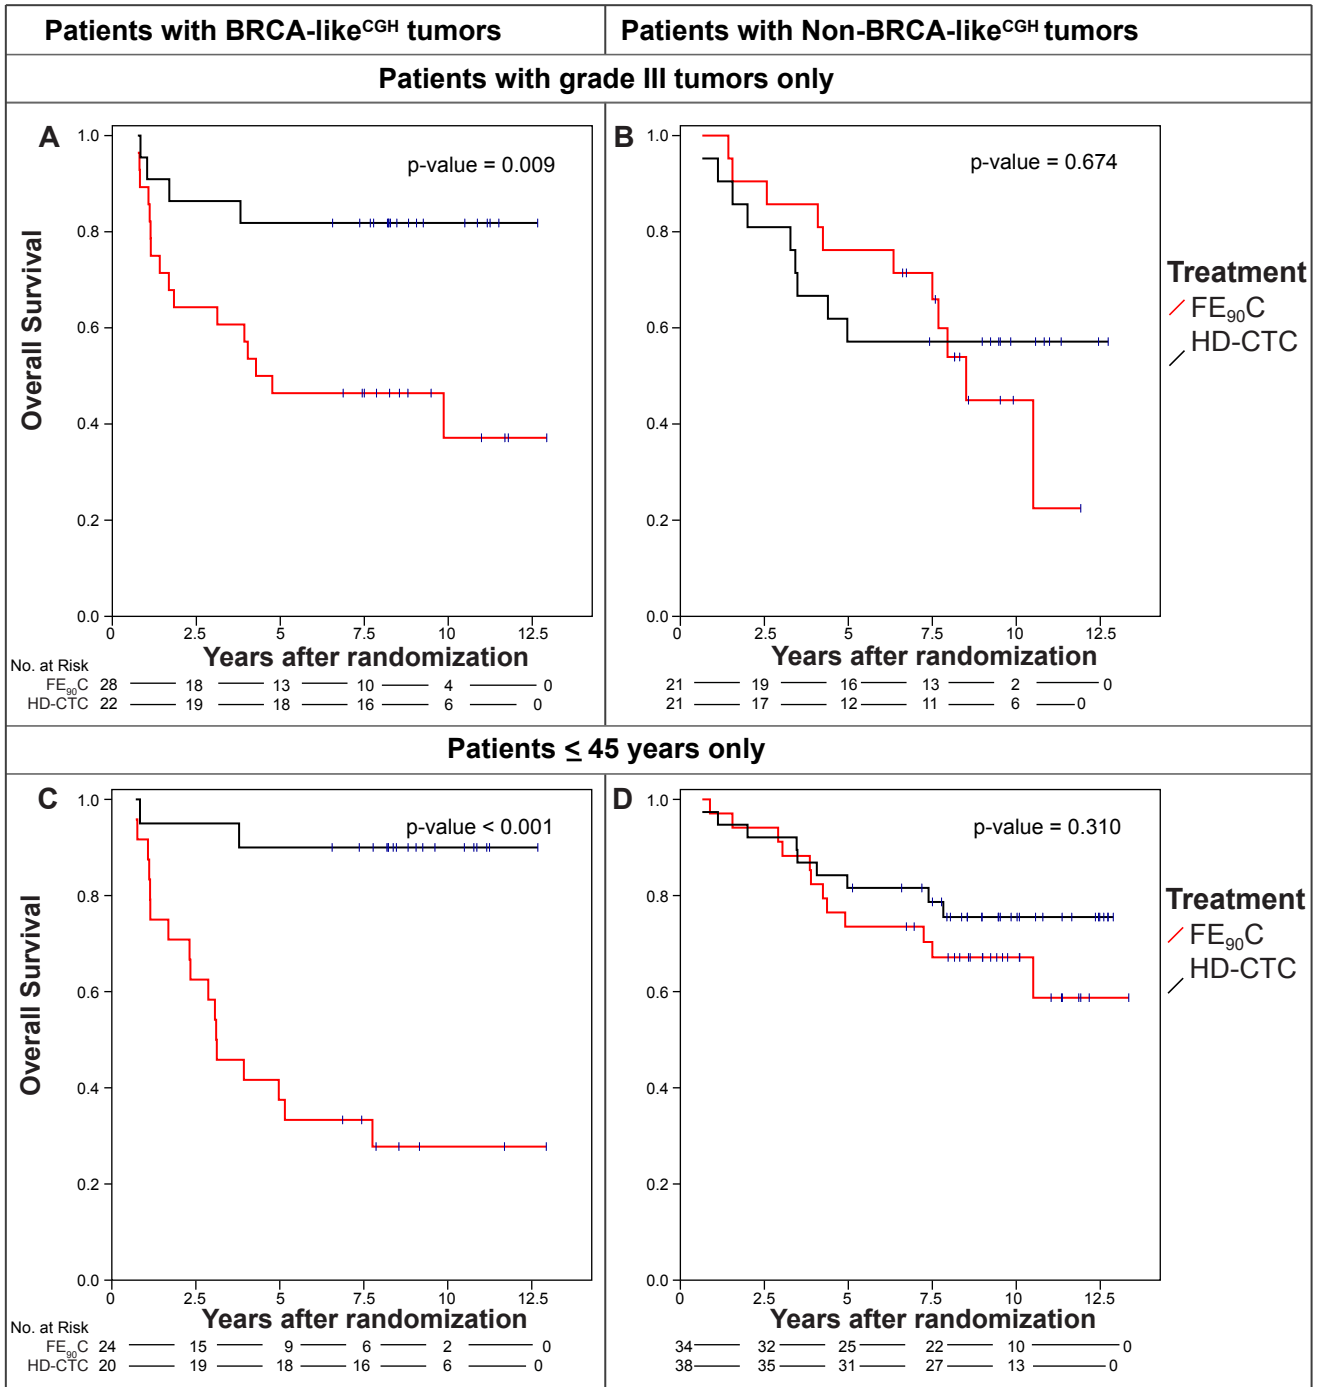

Supplement: bcr3655-S2.pdf [file bcr3655-S2.pdf]
